# Supplementary material
Source: publisher site journal article supplement (https://www.dovepress.com/article/255262)
Supplement: Supplementary file 1 [file get_supplementary_file.php]

**Table S1** DEMs between COPD and normal plasma from GSE24709 dataset.

| ID | adj.*P*.Value | *P*.Value | t | B | logFC |
| --- | --- | --- | --- | --- | --- |
| hsa-miR-1246 | 3.23E-05 | 2.24E-07 | 6.107565 | 6.937 | 4.364558 |
| hsa-miR-613 | 2.77E-05 | 9.63E-08 | 6.355958 | 7.7467 | 4.336702 |
| hsa-miR-593 | 1.21E-05 | 2.81E-08 | 6.717817 | 8.9263 | 4.202908 |
| hsa-miR-651 | 2.96E-05 | 1.37E-07 | 6.252075 | 7.408 | 4.122162 |
| hsa-miR-1258 | 0.000433 | 1.15E-05 | 4.937942 | 3.1749 | 3.951598 |
| hsa-miR-432 | 0.00038 | 7.93E-06 | 5.051451 | 3.5333 | 3.894335 |
| hsa-miR-556-3p | 0.000433 | 1.10E-05 | 4.952705 | 3.2214 | 3.679313 |
| hsa-miR-515-3p | 0.000211 | 3.42E-06 | 5.302921 | 4.334 | 3.621387 |
| hsa-miR-1299 | 4.32E-06 | 5.00E-09 | 7.225674 | 10.5757 | 3.54038 |
| hsa-miR-376a* | 0.00053 | 1.47E-05 | 4.864178 | 2.9432 | 3.517347 |
| hsa-miR-185* | 8.28E-05 | 7.68E-07 | 5.74579 | 5.7612 | 3.50234 |
| hsa-miR-548d-5p | 0.000433 | 1.11E-05 | 4.951222 | 3.2167 | 3.498913 |
| hsa-miR-1468 | 0.001843 | 8.91E-05 | 4.309706 | 1.2375 | 3.459944 |
| hsa-miR-1262 | 0.000183 | 2.59E-06 | 5.386253 | 4.6011 | 3.428862 |
| hsa-miR-1204 | 0.000183 | 2.34E-06 | 5.4164 | 4.6979 | 3.408936 |
| hsa-miR-302b | 0.00059 | 1.71E-05 | 4.81888 | 2.8014 | 3.300821 |
| hsa-miR-184 | 0.000433 | 1.15E-05 | 4.938203 | 3.1757 | 3.218191 |
| hsa-miR-520d-3p | 0.003184 | 2.07E-04 | 4.042681 | 0.4443 | 3.217749 |
| hsa-miR-1294 | 0.003831 | 2.57E-04 | 3.971784 | 0.2375 | 3.19927 |
| hsa-miR-548j | 0.002057 | 1.07E-04 | 4.250999 | 1.0613 | 3.170839 |
| hsa-miR-224 | 4.54E-05 | 3.68E-07 | 5.96201 | 6.4632 | 3.16079 |
| hsa-miR-644 | 0.001386 | 5.44E-05 | 4.463582 | 1.7037 | 3.091473 |
| hsa-miR-609 | 0.001432 | 5.97E-05 | 4.43451 | 1.6151 | 3.064778 |
| hsa-miR-95 | 0.000125 | 1.31E-06 | 5.588751 | 5.2531 | 2.99661 |
| hsa-miR-196a | 0.005828 | 6.01E-04 | 3.693948 | -0.5562 | 2.934865 |
| hsa-miR-1265 | 0.004217 | 2.98E-04 | 3.924354 | 0.1 | 2.934809 |
| hsa-miR-488 | 0.002599 | 1.48E-04 | 4.150209 | 0.7612 | 2.921256 |
| hsa-miR-601 | 0.001893 | 9.43E-05 | 4.291698 | 1.1834 | 2.914862 |
| hsa-miR-135a | 0.003897 | 2.71E-04 | 3.955295 | 0.1896 | 2.881567 |
| hsa-miR-190b | 0.001386 | 5.62E-05 | 4.453483 | 1.6729 | 2.812611 |
| hsa-miR-140-5p | 0.000154 | 1.79E-06 | 5.495902 | 4.9537 | 2.800839 |
| hsa-miR-373 | 0.002057 | 1.10E-04 | 4.244276 | 1.0412 | 2.781753 |
| hsa-miR-520c-3p | 0.005731 | 5.79E-04 | 3.706288 | -0.5216 | 2.748941 |
| hsa-miR-1914 | 0.00038 | 7.25E-06 | 5.078205 | 3.618 | 2.719419 |
| hsa-miR-206 | 0.003536 | 2.34E-04 | 4.003261 | 0.3291 | 2.707056 |
| hsa-miR-29c* | 0.009872 | 1.40E-03 | 3.407458 | -1.3429 | 2.699339 |
| hsa-miR-204 | 0.010767 | 1.56E-03 | 3.370364 | -1.4421 | 2.656454 |
| hsa-miR-126* | 0.010792 | 1.58E-03 | 3.366795 | -1.4516 | 2.603266 |
| hsa-let-7b* | 0.001592 | 7.01E-05 | 4.384724 | 1.464 | 2.592303 |
| hsa-miR-629 | 0.012393 | 1.91E-03 | 3.299759 | -1.6292 | 2.537512 |
| hsa-miR-1282 | 0.011465 | 1.69E-03 | 3.343054 | -1.5148 | 2.485195 |
| hsa-miR-513c | 0.000676 | 2.12E-05 | 4.754122 | 2.5993 | 2.442305 |
| hsa-miR-130b* | 0.015657 | 2.77E-03 | 3.168025 | -1.972 | 2.419255 |
| hsa-miR-620 | 0.005695 | 5.54E-04 | 3.720796 | -0.4808 | 2.418622 |
| hsa-miR-876-3p | 0.007205 | 8.85E-04 | 3.564244 | -0.9166 | 2.388885 |
| hsa-let-7f-1* | 0.007549 | 9.36E-04 | 3.545277 | -0.9688 | 2.327514 |
| hsa-miR-340* | 0.013986 | 2.27E-03 | 3.239186 | -1.7879 | 2.319932 |
| hsa-miR-519e | 0.014574 | 2.48E-03 | 3.207333 | -1.8706 | 2.314334 |
| hsa-miR-548c-5p | 0.004665 | 3.94E-04 | 3.833287 | -0.1617 | 2.253322 |
| hsa-miR-125b-1* | 0.02286 | 4.69E-03 | 2.977436 | -2.4523 | 2.186885 |
| hsa-miR-30b* | 0.019612 | 3.84E-03 | 3.050508 | -2.2704 | 2.148139 |
| hsa-miR-302f | 0.010278 | 1.48E-03 | 3.389241 | -1.3917 | 2.13895 |
| hsa-miR-450a | 0.039497 | 9.38E-03 | 2.715581 | -3.0794 | 2.111936 |
| hsa-miR-154 | 0.014381 | 2.40E-03 | 3.219368 | -1.8394 | 2.1082 |
| hsa-miR-105* | 0.023077 | 4.79E-03 | 2.96962 | -2.4715 | 2.089686 |
| hsa-miR-553 | 0.026123 | 5.66E-03 | 2.907578 | -2.6234 | 2.010562 |
| hsa-miR-1279 | 0.038682 | 9.05E-03 | 2.729338 | -3.0475 | 1.992928 |
| hsa-miR-522 | 0.046644 | 1.20E-02 | 2.619332 | -3.2997 | 1.99227 |
| hsa-miR-942 | 0.032266 | 7.33E-03 | 2.810349 | -2.857 | 1.944251 |
| hsa-miR-577 | 0.021139 | 4.21E-03 | 3.016715 | -2.3548 | 1.902117 |
| hsa-miR-181d | 0.005731 | 5.81E-04 | 3.705136 | -0.5248 | 1.899752 |
| hsa-miR-99a* | 0.006752 | 7.58E-04 | 3.616594 | -0.772 | 1.891351 |
| hsa-miR-23a* | 0.042664 | 1.03E-02 | 2.678101 | -3.1659 | 1.869926 |
| hsa-miR-875-3p | 0.003078 | 1.96E-04 | 4.059286 | 0.493 | 1.842675 |
| hsa-miR-1185 | 0.009872 | 1.41E-03 | 3.406304 | -1.3459 | 1.829461 |
| hsa-miR-323-5p | 0.023077 | 4.80E-03 | 2.969124 | -2.4728 | 1.757792 |
| hsa-miR-125b-2* | 0.013261 | 2.14E-03 | 3.2605 | -1.7323 | 1.747631 |
| hsa-miR-551a | 0.004348 | 3.17E-04 | 3.903896 | 0.041 | 1.743941 |
| hsa-miR-1182 | 0.048218 | 1.26E-02 | 2.600969 | -3.3411 | 1.7386 |
| hsa-miR-626 | 0.006752 | 7.59E-04 | 3.615963 | -0.7737 | 1.72977 |
| hsa-miR-148b* | 0.005731 | 5.84E-04 | 3.703306 | -0.53 | 1.722257 |
| hsa-miR-586 | 0.005731 | 5.83E-04 | 3.703844 | -0.5285 | 1.715734 |
| hsa-miR-369-5p | 0.001386 | 5.27E-05 | 4.47349 | 1.7339 | 1.710756 |
| hsa-miR-432* | 0.007205 | 8.64E-04 | 3.572347 | -0.8943 | 1.645943 |
| hsa-miR-378* | 0.003053 | 1.91E-04 | 4.067841 | 0.5181 | 1.626581 |
| hsa-miR-373* | 0.044498 | 1.14E-02 | 2.640933 | -3.2508 | 1.60173 |
| hsa-miR-195* | 0.014712 | 2.56E-03 | 3.196807 | -1.8978 | 1.598652 |
| hsa-miR-767-3p | 0.004813 | 4.18E-04 | 3.81377 | -0.2174 | 1.514585 |
| hsa-miR-509-5p | 0.043664 | 1.10E-02 | -2.65435 | -3.2202 | -1.52904 |
| hsa-miR-377 | 0.001843 | 8.97E-05 | -4.30755 | 1.231 | -1.53325 |
| hsa-miR-580 | 0.026123 | 5.60E-03 | -2.91171 | -2.6133 | -1.54327 |
| hsa-miR-499-3p | 0.006152 | 6.56E-04 | -3.66485 | -0.6377 | -1.54639 |
| hsa-miR-106a* | 0.043664 | 1.09E-02 | -2.65572 | -3.2171 | -1.58441 |
| hsa-miR-548a-3p | 0.027023 | 6.01E-03 | -2.88504 | -2.678 | -1.58953 |
| hsa-miR-597 | 0.02726 | 6.10E-03 | -2.87982 | -2.6906 | -1.60029 |
| hsa-miR-548o | 0.005482 | 5.27E-04 | -3.73771 | -0.4331 | -1.62571 |
| hsa-miR-1911 | 0.02189 | 4.44E-03 | -2.99757 | -2.4024 | -1.64678 |
| hsa-miR-519a* | 0.017799 | 3.38E-03 | -3.09658 | -2.1543 | -1.6704 |
| hsa-miR-200c* | 0.024125 | 5.11E-03 | -2.94546 | -2.5309 | -1.67579 |
| hsa-miR-380* | 0.014827 | 2.59E-03 | -3.19167 | -1.9111 | -1.70372 |
| hsa-miR-517* | 0.01412 | 2.32E-03 | -3.23069 | -1.81 | -1.71653 |
| hsa-miR-744* | 0.014433 | 2.43E-03 | -3.21564 | -1.8491 | -1.71735 |
| hsa-miR-153 | 0.043148 | 1.06E-02 | -2.66994 | -3.1846 | -1.72871 |
| hsa-miR-452* | 0.00076 | 2.48E-05 | -4.7059 | 2.4494 | -1.73642 |
| hsa-miR-18b | 0.004613 | 3.61E-04 | -3.86176 | -0.0802 | -1.73784 |
| hsa-miR-636 | 0.002807 | 1.66E-04 | -4.1129 | 0.6508 | -1.73925 |
| hsa-miR-615-5p | 0.021873 | 4.39E-03 | -3.00179 | -2.392 | -1.74417 |
| hsa-miR-490-5p | 0.014115 | 2.31E-03 | -3.23343 | -1.8029 | -1.74468 |
| hsa-miR-608 | 0.026317 | 5.74E-03 | -2.90245 | -2.6359 | -1.77013 |
| hsa-miR-566 | 0.015657 | 2.78E-03 | -3.16706 | -1.9745 | -1.7765 |
| hsa-miR-217 | 0.01175 | 1.79E-03 | -3.32224 | -1.5699 | -1.7795 |
| hsa-miR-24-1* | 0.005113 | 4.50E-04 | -3.78954 | -0.2863 | -1.78378 |
| hsa-miR-558 | 0.039799 | 9.50E-03 | -2.71075 | -3.0906 | -1.79079 |
| hsa-miR-572 | 0.00816 | 1.03E-03 | -3.51432 | -1.0535 | -1.79744 |
| hsa-miR-1291 | 0.00977 | 1.34E-03 | -3.42383 | -1.2989 | -1.82603 |
| hsa-miR-559 | 0.020047 | 3.97E-03 | -3.03823 | -2.3012 | -1.84235 |
| hsa-miR-564 | 0.006744 | 7.35E-04 | -3.62693 | -0.7433 | -1.8699 |
| hsa-miR-1308 | 0.03893 | 9.16E-03 | -2.72496 | -3.0576 | -1.87234 |
| hsa-miR-21* | 0.035688 | 8.27E-03 | -2.76416 | -2.9661 | -1.87637 |
| hsa-miR-655 | 0.01175 | 1.79E-03 | -3.32285 | -1.5683 | -1.88625 |
| hsa-miR-205 | 0.002503 | 1.39E-04 | -4.16864 | 0.8158 | -1.91069 |
| hsa-miR-513a-3p | 0.039497 | 9.36E-03 | -2.71631 | -3.0777 | -1.92466 |
| hsa-miR-129* | 0.00714 | 8.43E-04 | -3.58053 | -0.8718 | -1.93865 |
| hsa-miR-492 | 0.00454 | 3.47E-04 | -3.87498 | -0.0422 | -1.95233 |
| hsa-miR-634 | 0.00714 | 8.44E-04 | -3.58028 | -0.8724 | -1.9565 |
| hsa-miR-606 | 0.00523 | 4.91E-04 | -3.76103 | -0.3672 | -1.97214 |
| hsa-miR-30e* | 0.015692 | 2.82E-03 | -3.16164 | -1.9884 | -1.99982 |
| hsa-miR-1233 | 0.006061 | 6.32E-04 | -3.67714 | -0.6033 | -2.00754 |
| hsa-miR-146a* | 0.019677 | 3.88E-03 | -3.04715 | -2.2788 | -2.01843 |
| hsa-miR-331-5p | 0.016612 | 3.06E-03 | -3.13258 | -2.0627 | -2.02214 |
| hsa-miR-497 | 0.009828 | 1.37E-03 | -3.41599 | -1.3199 | -2.04513 |
| hsa-miR-208a | 0.01175 | 1.80E-03 | -3.32103 | -1.5731 | -2.04683 |
| hsa-miR-122* | 0.009703 | 1.30E-03 | -3.43207 | -1.2767 | -2.0511 |
| hsa-miR-214 | 0.01725 | 3.24E-03 | -3.11231 | -2.1144 | -2.07003 |
| hsa-miR-429 | 0.00454 | 3.39E-04 | -3.88297 | -0.0193 | -2.10059 |
| hsa-miR-182* | 0.00076 | 2.55E-05 | -4.69661 | 2.4206 | -2.11348 |
| hsa-miR-216a | 0.001247 | 4.48E-05 | -4.52384 | 1.8879 | -2.13356 |
| hsa-miR-384 | 0.00454 | 3.47E-04 | -3.87472 | -0.043 | -2.1892 |
| hsa-miR-518b | 0.001247 | 4.44E-05 | -4.52682 | 1.897 | -2.21926 |
| hsa-miR-646 | 0.002807 | 1.65E-04 | -4.11506 | 0.6572 | -2.23635 |
| hsa-miR-1471 | 0.009822 | 1.35E-03 | -3.41909 | -1.3116 | -2.28145 |
| hsa-miR-568 | 0.007205 | 8.77E-04 | -3.56737 | -0.908 | -2.30857 |
| hsa-miR-136 | 0.003897 | 2.69E-04 | -3.95746 | 0.1959 | -2.36627 |
| hsa-miR-1288 | 0.006679 | 7.20E-04 | -3.63376 | -0.7243 | -2.40071 |
| hsa-miR-556-5p | 0.012644 | 2.01E-03 | -3.28235 | -1.675 | -2.40868 |
| hsa-miR-127-5p | 0.008704 | 1.11E-03 | -3.48747 | -1.1267 | -2.43923 |
| hsa-miR-1283 | 0.008864 | 1.15E-03 | -3.4751 | -1.1603 | -2.50852 |
| hsa-miR-337-3p | 0.001592 | 6.86E-05 | -4.39153 | 1.4846 | -2.55912 |
| hsa-miR-30c-1* | 0.012486 | 1.95E-03 | -3.29193 | -1.6498 | -2.59837 |
| hsa-miR-758 | 0.001843 | 8.52E-05 | -4.32353 | 1.2791 | -2.62795 |
| hsa-miR-519b-5p | 0.00816 | 1.03E-03 | -3.51258 | -1.0583 | -2.63841 |
| hsa-miR-491-3p | 0.005162 | 4.73E-04 | -3.77303 | -0.3332 | -2.69903 |
| hsa-miR-200a* | 0.00038 | 7.49E-06 | -5.06843 | 3.5871 | -2.76913 |
| hsa-miR-548p | 0.002154 | 1.17E-04 | -4.223 | 0.9776 | -2.86987 |
| hsa-miR-98 | 0.004665 | 3.95E-04 | -3.83288 | -0.1629 | -2.95119 |
| hsa-miR-323-3p | 0.001843 | 8.65E-05 | -4.31888 | 1.2651 | -2.99343 |
| hsa-miR-662 | 0.000647 | 1.95E-05 | -4.77911 | 2.6772 | -3.15811 |
| hsa-miR-9 | 3.23E-05 | 2.21E-07 | -6.11223 | 6.9522 | -3.47054 |

**Abbreviations:** COPD, chronic obstructive pulmonary disease; DEM, differentially expressed microRNA.

**Table S2** DEMs between COPD and normal plasma from GSE61741 dataset.

| ID | adj.*P*.Value | *P*.Value | t | B | logFC |
| --- | --- | --- | --- | --- | --- |
| hsa-miR-1246 | 0.000129 | 3.35E-06 | 4.83811 | 4.2019 | 2.273966 |
| hsa-miR-302c | 0.000104 | 2.58E-06 | 4.89807 | 4.446 | 2.148716 |
| hsa-miR-1258 | 0.000155 | 4.75E-06 | 4.75695 | 3.8749 | 2.088643 |
| hsa-miR-885-5p | 0.000104 | 2.55E-06 | 4.90061 | 4.4564 | 2.049082 |
| hsa-miR-130b* | 4.22E-05 | 6.46E-07 | 5.20976 | 5.7482 | 2.021895 |
| hsa-miR-135a | 0.000188 | 5.98E-06 | 4.70285 | 3.6592 | 1.955393 |
| hsa-miR-432 | 0.000951 | 4.49E-05 | 4.21006 | 1.7787 | 1.874084 |
| hsa-miR-875-3p | 0.000255 | 8.43E-06 | 4.62128 | 3.3373 | 1.760168 |
| hsa-miR-1279 | 0.000306 | 1.16E-05 | 4.54562 | 3.0424 | 1.730914 |
| hsa-miR-376a* | 0.002458 | 1.80E-04 | 3.84663 | 0.4955 | 1.717994 |
| hsa-miR-1468 | 0.002721 | 2.09E-04 | 3.80538 | 0.3557 | 1.698283 |
| hsa-miR-380 | 0.001585 | 9.26E-05 | 4.0231 | 1.1071 | 1.663081 |
| hsa-miR-126* | 0.002685 | 2.03E-04 | 3.81396 | 0.3847 | 1.642839 |
| hsa-miR-508-3p | 0.00395 | 3.77E-04 | 3.642 | -0.1859 | 1.63696 |
| hsa-miR-105* | 0.002236 | 1.45E-04 | 3.90433 | 0.6931 | 1.629273 |
| hsa-miR-556-3p | 0.005821 | 6.45E-04 | 3.48866 | -0.6763 | 1.621556 |
| hsa-miR-92a-1* | 0.006066 | 7.01E-04 | 3.46451 | -0.7519 | 1.598978 |
| hsa-miR-202 | 0.00593 | 6.71E-04 | 3.47713 | -0.7125 | 1.567775 |
| hsa-miR-204 | 0.002419 | 1.69E-04 | 3.8629 | 0.551 | 1.544571 |
| hsa-miR-561 | 0.002728 | 2.25E-04 | -3.78521 | 0.2878 | -1.5114 |
| hsa-miR-374a* | 0.002419 | 1.67E-04 | -3.86562 | 0.5603 | -1.66874 |
| hsa-miR-1247 | 8.01E-05 | 1.42E-06 | -5.03461 | 5.0096 | -1.69982 |
| hsa-miR-497 | 2.9E-05 | 2.69E-07 | -5.40143 | 6.5758 | -1.73031 |
| hsa-miR-492 | 2.9E-05 | 2.90E-07 | -5.385 | 6.5041 | -1.75972 |
| hsa-miR-597 | 0.000104 | 2.42E-06 | -4.91318 | 4.5078 | -1.8556 |
| hsa-miR-182* | 1.03E-05 | 2.42E-08 | -5.90734 | 8.8506 | -1.96839 |

**Abbreviations:** COPD, chronic obstructive pulmonary disease; DEM, differentially expressed microRNA.

**Table S3** DEMs between COPD and normal plasma from GSE31568 dataset.

| ID | adj.*P*.Value | *P*.Value | t | B | logFC |
| --- | --- | --- | --- | --- | --- |
| hsa-miR-184 | 6.04E-04 | 1.40E-05 | 4.5765 | 2.87785 | 2.58745 |
| hsa-miR-556-3p | 8.83E-03 | 6.55E-04 | 3.52177 | -0.69902 | 2.19656 |
| hsa-miR-1258 | 1.25E-02 | 1.04E-03 | 3.38195 | -1.12116 | 2.14525 |
| hsa-miR-450a | 1.23E-02 | 9.82E-04 | 3.3991 | -1.07008 | 2.12014 |
| hsa-miR-1299 | 6.59E-03 | 4.20E-04 | 3.65322 | -0.29019 | 2.05716 |
| hsa-miR-1246 | 2.91E-02 | 4.24E-03 | 2.9285 | -2.39562 | 1.96982 |
| hsa-miR-1468 | 2.17E-02 | 2.69E-03 | 3.08017 | -1.9859 | 1.91932 |
| hsa-miR-95 | 8.58E-03 | 5.98E-04 | 3.54895 | -0.6154 | 1.88951 |
| hsa-miR-130b* | 2.38E-02 | 3.06E-03 | 3.03788 | -2.10187 | 1.83698 |
| hsa-miR-369-5p | 8.58E-03 | 6.23E-04 | 3.5366 | -0.65344 | 1.82935 |
| hsa-miR-513c | 1.90E-02 | 2.04E-03 | 3.16941 | -1.73694 | 1.78003 |
| hsa-miR-126* | 3.97E-02 | 6.31E-03 | 2.79207 | -2.74937 | 1.71484 |
| hsa-miR-553 | 2.73E-02 | 3.90E-03 | 2.95738 | -2.31891 | 1.71008 |
| hsa-miR-196a | 3.01E-02 | 4.59E-03 | 2.90204 | -2.46534 | 1.67791 |
| hsa-miR-586 | 1.25E-02 | 1.12E-03 | 3.35821 | -1.19151 | 1.66096 |
| hsa-miR-224 | 2.17E-02 | 2.64E-03 | 3.08577 | -1.97045 | 1.61605 |
| hsa-miR-625 | 3.01E-02 | 4.60E-03 | 2.90112 | -2.46774 | 1.56879 |
| hsa-miR-383 | 1.25E-02 | 1.11E-03 | 3.36208 | -1.18005 | 1.53146 |
| hsa-miR-517* | 2.27E-03 | 9.70E-05 | -4.06658 | 1.06677 | -1.50326 |
| hsa-miR-1287 | 1.29E-02 | 1.24E-03 | -3.32631 | -1.28542 | -1.50745 |
| hsa-miR-217 | 7.97E-03 | 5.26E-04 | -3.58673 | -0.49841 | -1.51288 |
| hsa-miR-922 | 2.53E-02 | 3.52E-03 | -2.99173 | -2.22689 | -1.54106 |
| hsa-miR-1197 | 1.90E-02 | 2.07E-03 | -3.16499 | -1.74942 | -1.55328 |
| hsa-miR-363* | 1.28E-02 | 1.19E-03 | -3.3398 | -1.24579 | -1.55342 |
| hsa-miR-1276 | 2.91E-02 | 4.24E-03 | -2.92906 | -2.39413 | -1.55647 |
| hsa-miR-323-3p | 3.50E-02 | 5.39E-03 | -2.84648 | -2.61 | -1.59569 |
| hsa-miR-384 | 2.04E-02 | 2.30E-03 | -3.13102 | -1.84477 | -1.59625 |
| hsa-miR-129-3p | 8.25E-04 | 2.10E-05 | -4.4721 | 2.49559 | -1.62082 |
| hsa-miR-129* | 2.48E-02 | 3.39E-03 | -3.00401 | -2.19377 | -1.62659 |
| hsa-miR-325 | 1.28E-02 | 1.17E-03 | -3.34509 | -1.23022 | -1.64111 |
| hsa-miR-1183 | 7.99E-04 | 1.94E-05 | -4.49234 | 2.56923 | -1.65701 |
| hsa-miR-330-3p | 1.44E-04 | 1.31E-06 | -5.16032 | 5.11357 | -1.67144 |
| hsa-miR-559 | 3.64E-03 | 1.94E-04 | -3.87437 | 0.42267 | -1.69227 |
| hsa-miR-554 | 5.75E-04 | 1.20E-05 | -4.61561 | 3.02248 | -1.69239 |
| hsa-miR-24-1* | 3.35E-03 | 1.63E-04 | -3.92286 | 0.58306 | -1.71008 |
| hsa-miR-9 | 1.25E-02 | 1.13E-03 | -3.3568 | -1.19566 | -1.72604 |
| hsa-miR-491-3p | 2.06E-02 | 2.39E-03 | -3.11821 | -1.8805 | -1.73398 |
| hsa-miR-208a | 1.25E-02 | 1.03E-03 | -3.38466 | -1.11311 | -1.73429 |
| hsa-miR-326 | 2.83E-03 | 1.35E-04 | -3.97654 | 0.7623 | -1.73705 |
| hsa-miR-200c* | 6.18E-03 | 3.80E-04 | -3.68258 | -0.19736 | -1.74747 |
| hsa-miR-1233 | 1.05E-03 | 2.91E-05 | -4.38746 | 2.18989 | -1.76461 |
| hsa-miR-510 | 1.51E-02 | 1.56E-03 | -3.25616 | -1.48946 | -1.80354 |
| hsa-miR-21* | 1.75E-03 | 6.09E-05 | -4.1924 | 1.50024 | -1.84193 |
| hsa-miR-153 | 1.21E-03 | 3.65E-05 | -4.32822 | 1.9782 | -1.86965 |
| hsa-miR-636 | 9.24E-05 | 6.42E-07 | -5.32823 | 5.7848 | -1.87769 |
| hsa-miR-568 | 3.64E-03 | 1.91E-04 | -3.87819 | 0.43525 | -1.88177 |
| hsa-miR-216a | 6.04E-04 | 1.40E-05 | -4.57709 | 2.88001 | -1.92422 |
| hsa-miR-106a* | 2.01E-03 | 7.46E-05 | -4.13799 | 1.31165 | -1.95429 |
| hsa-miR-205 | 1.78E-03 | 6.40E-05 | -4.17902 | 1.45369 | -1.97543 |
| hsa-miR-127-5p | 9.87E-03 | 7.43E-04 | -3.48364 | -0.81545 | -1.98037 |
| hsa-miR-30c-1* | 1.25E-02 | 1.09E-03 | -3.36761 | -1.16369 | -1.98896 |
| hsa-miR-634 | 1.13E-03 | 3.26E-05 | -4.35796 | 2.08423 | -2.00257 |
| hsa-miR-519a* | 4.41E-03 | 2.40E-04 | -3.8143 | 0.22598 | -2.02057 |
| hsa-miR-136 | 2.27E-03 | 1.05E-04 | -4.04425 | 0.99081 | -2.03304 |
| hsa-miR-556-5p | 2.83E-04 | 5.24E-06 | -4.8226 | 3.8007 | -2.07414 |
| hsa-miR-492 | 1.45E-03 | 4.86E-05 | -4.2526 | 1.71082 | -2.10641 |
| hsa-miR-1308 | 5.29E-03 | 2.94E-04 | -3.7563 | 0.03822 | -2.11778 |
| hsa-miR-490-5p | 1.44E-04 | 1.86E-06 | -5.07588 | 4.78053 | -2.17579 |
| hsa-miR-566 | 1.44E-04 | 1.94E-06 | -5.06481 | 4.73709 | -2.19282 |
| hsa-miR-1283 | 1.44E-04 | 1.67E-06 | -5.10132 | 4.88055 | -2.20205 |
| hsa-miR-646 | 1.44E-04 | 1.65E-06 | -5.1048 | 4.89424 | -2.23348 |
| hsa-miR-519b-5p | 1.85E-04 | 2.99E-06 | -4.96011 | 4.32903 | -2.2386 |
| hsa-miR-214 | 2.00E-04 | 3.48E-06 | -4.92369 | 4.18825 | -2.2597 |
| hsa-miR-518b | 1.44E-04 | 2.17E-06 | -5.0388 | 4.63529 | -2.27256 |
| hsa-miR-564 | 3.71E-06 | 1.72E-08 | -6.1501 | 9.22227 | -2.4445 |
| hsa-miR-200a* | 3.01E-04 | 5.93E-06 | -4.79212 | 3.68481 | -2.45028 |
| hsa-miR-1471 | 3.27E-06 | 1.14E-08 | -6.24143 | 9.61787 | -2.54012 |
| hsa-miR-497 | 2.50E-05 | 1.45E-07 | -5.67304 | 7.19809 | -2.54162 |
| hsa-miR-662 | 1.44E-04 | 2.10E-06 | -5.04605 | 4.66365 | -2.55229 |
| hsa-miR-182* | 9.98E-07 | 1.16E-09 | -6.73534 | 11.79594 | -2.7493 |
| hsa-miR-548p | 3.27E-06 | 9.04E-09 | -6.29139 | 9.83526 | -2.96585 |

**Abbreviations:** COPD, chronic obstructive pulmonary disease; DEM, differentially expressed microRNA.

**Table S4** Target genes of DEMs predicted by miRNet.

| ID | Gene |
| --- | --- |
| hsa-mir-182-3p | ACACA |
| hsa-mir-182-3p | ACTG1 |
| hsa-mir-182-3p | ALDH1A3 |
| hsa-mir-182-3p | DUSP1 |
| hsa-mir-182-3p | FOXK2 |
| hsa-mir-182-3p | KCNJ10 |
| hsa-mir-182-3p | RPS6 |
| hsa-mir-182-3p | STAT5B |
| hsa-mir-182-3p | TFRC |
| hsa-mir-182-3p | YWHAE |
| hsa-mir-182-3p | RNMT |
| hsa-mir-182-3p | VAMP3 |
| hsa-mir-182-3p | SCO2 |
| hsa-mir-182-3p | ABCF2 |
| hsa-mir-182-3p | STAMBP |
| hsa-mir-182-3p | EBNA1BP2 |
| hsa-mir-182-3p | PSD3 |
| hsa-mir-182-3p | MOCS3 |
| hsa-mir-182-3p | TOR1B |
| hsa-mir-182-3p | NOX4 |
| hsa-mir-182-3p | CPA4 |
| hsa-mir-182-3p | RTCB |
| hsa-mir-182-3p | ASXL2 |
| hsa-mir-182-3p | FBXW7 |
| hsa-mir-182-3p | TMEM30A |
| hsa-mir-182-3p | CBWD1 |
| hsa-mir-182-3p | ZC4H2 |
| hsa-mir-182-3p | DDA1 |
| hsa-mir-182-3p | ARID5B |
| hsa-mir-182-3p | SLC35B4 |
| hsa-mir-182-3p | SCIN |
| hsa-mir-182-3p | HPS4 |
| hsa-mir-182-3p | PYGO2 |
| hsa-mir-182-3p | MYADM |
| hsa-mir-182-3p | GSTO2 |
| hsa-mir-182-3p | RIMBP3C |
| hsa-mir-182-3p | PRR14L |
| hsa-mir-182-3p | PGM2L1 |
| hsa-mir-182-3p | VHLL |
| hsa-mir-182-3p | ZNF704 |
| hsa-mir-126-5p | AVPR1A |
| hsa-mir-126-5p | COL19A1 |
| hsa-mir-126-5p | CRK |
| hsa-mir-126-5p | CSNK1G3 |
| hsa-mir-126-5p | CYLD |
| hsa-mir-126-5p | DSG2 |
| hsa-mir-126-5p | DSPP |
| hsa-mir-126-5p | DVL3 |
| hsa-mir-126-5p | ELK4 |
| hsa-mir-126-5p | ERCC6 |
| hsa-mir-126-5p | FOXO3 |
| hsa-mir-126-5p | FYB1 |
| hsa-mir-126-5p | GABRA4 |
| hsa-mir-126-5p | GATM |
| hsa-mir-126-5p | GLUD1 |
| hsa-mir-126-5p | GRIK5 |
| hsa-mir-126-5p | NR3C1 |
| hsa-mir-126-5p | MR1 |
| hsa-mir-126-5p | HOXB6 |
| hsa-mir-126-5p | HOXC8 |
| hsa-mir-126-5p | MRPL58 |
| hsa-mir-126-5p | IFIT1 |
| hsa-mir-126-5p | IL6R |
| hsa-mir-126-5p | MMP7 |
| hsa-mir-126-5p | MYBL1 |
| hsa-mir-126-5p | MYC |
| hsa-mir-126-5p | MYCN |
| hsa-mir-126-5p | NPTX1 |
| hsa-mir-126-5p | PGM3 |
| hsa-mir-126-5p | PLAG1 |
| hsa-mir-126-5p | MAPK8 |
| hsa-mir-126-5p | PTPN7 |
| hsa-mir-126-5p | CXCL12 |
| hsa-mir-126-5p | SMARCC2 |
| hsa-mir-126-5p | SON |
| hsa-mir-126-5p | TFRC |
| hsa-mir-126-5p | NR2C2 |
| hsa-mir-126-5p | UGT8 |
| hsa-mir-126-5p | VEGFA |
| hsa-mir-126-5p | ZFP36 |
| hsa-mir-126-5p | ZNF180 |
| hsa-mir-126-5p | ZNF223 |
| hsa-mir-126-5p | ZXDA |
| hsa-mir-126-5p | NCOA3 |
| hsa-mir-126-5p | SERF1A |
| hsa-mir-126-5p | SEMA7A |
| hsa-mir-126-5p | AOC3 |
| hsa-mir-126-5p | GALNT4 |
| hsa-mir-126-5p | ADAM9 |
| hsa-mir-126-5p | NAPG |
| hsa-mir-126-5p | MBD2 |
| hsa-mir-126-5p | SOCS3 |
| hsa-mir-126-5p | VAPA |
| hsa-mir-126-5p | NOLC1 |
| hsa-mir-126-5p | SRSF11 |
| hsa-mir-126-5p | SCAMP1 |
| hsa-mir-126-5p | BZW1 |
| hsa-mir-126-5p | HNRNPDL |
| hsa-mir-126-5p | SLC12A6 |
| hsa-mir-126-5p | PPIF |
| hsa-mir-126-5p | ZBTB18 |
| hsa-mir-126-5p | ZNF460 |
| hsa-mir-126-5p | SMG1 |
| hsa-mir-126-5p | MYCBP2 |
| hsa-mir-126-5p | KIF1B |
| hsa-mir-126-5p | CBX5 |
| hsa-mir-126-5p | POFUT1 |
| hsa-mir-126-5p | CHMP2B |
| hsa-mir-126-5p | AFF4 |
| hsa-mir-126-5p | AGO2 |
| hsa-mir-126-5p | TMOD3 |
| hsa-mir-126-5p | SNX10 |
| hsa-mir-126-5p | PSAT1 |
| hsa-mir-126-5p | ITSN2 |
| hsa-mir-126-5p | ERGIC2 |
| hsa-mir-126-5p | CRNKL1 |
| hsa-mir-126-5p | ZBTB7A |
| hsa-mir-126-5p | BTBD1 |
| hsa-mir-126-5p | LEPROT |
| hsa-mir-126-5p | ARGLU1 |
| hsa-mir-126-5p | SETD5 |
| hsa-mir-126-5p | TMEM100 |
| hsa-mir-126-5p | CSGALNACT1 |
| hsa-mir-126-5p | NUFIP2 |
| hsa-mir-126-5p | SLAIN2 |
| hsa-mir-126-5p | GPBP1 |
| hsa-mir-126-5p | WNK1 |
| hsa-mir-126-5p | C8orf33 |
| hsa-mir-126-5p | METTL8 |
| hsa-mir-126-5p | LONRF3 |
| hsa-mir-126-5p | L2HGDH |
| hsa-mir-126-5p | CSRNP3 |
| hsa-mir-126-5p | DCAF17 |
| hsa-mir-126-5p | ZNF703 |
| hsa-mir-126-5p | NAA50 |
| hsa-mir-126-5p | COQ10B |
| hsa-mir-126-5p | COASY |
| hsa-mir-126-5p | TRIM8 |
| hsa-mir-126-5p | ARID5B |
| hsa-mir-126-5p | ZNF566 |
| hsa-mir-126-5p | SLC45A3 |
| hsa-mir-126-5p | CDKN2AIPNL |
| hsa-mir-126-5p | TTC8 |
| hsa-mir-126-5p | TMEM182 |
| hsa-mir-126-5p | LIN54 |
| hsa-mir-126-5p | SPIN4 |
| hsa-mir-126-5p | SPTY2D1 |
| hsa-mir-126-5p | C18orf25 |
| hsa-mir-126-5p | SPRED1 |
| hsa-mir-126-5p | AGO3 |
| hsa-mir-126-5p | VMA21 |
| hsa-mir-126-5p | BRWD3 |
| hsa-mir-126-5p | BCLAF3 |
| hsa-mir-126-5p | ZNF326 |
| hsa-mir-126-5p | ZBTB41 |
| hsa-mir-126-5p | ZFP62 |
| hsa-mir-126-5p | SERF1B |
| hsa-mir-126-5p | HOTAIR |
| hsa-mir-126-5p | POC1B-GALNT4 |
| hsa-mir-492 | ALB |
| hsa-mir-492 | BAAT |
| hsa-mir-492 | BID |
| hsa-mir-492 | BSG |
| hsa-mir-492 | CDC34 |
| hsa-mir-492 | CDKN2A |
| hsa-mir-492 | CEBPG |
| hsa-mir-492 | HNRNPAB |
| hsa-mir-492 | HSD3B1 |
| hsa-mir-492 | IGF1R |
| hsa-mir-492 | MAT2A |
| hsa-mir-492 | MAP2K2 |
| hsa-mir-492 | PTEN |
| hsa-mir-492 | ST6GAL1 |
| hsa-mir-492 | SURF6 |
| hsa-mir-492 | TCF21 |
| hsa-mir-492 | XPC |
| hsa-mir-492 | MZF1 |
| hsa-mir-492 | BTG2 |
| hsa-mir-492 | BUB3 |
| hsa-mir-492 | RPH3AL |
| hsa-mir-492 | GDA |
| hsa-mir-492 | ZER1 |
| hsa-mir-492 | PPP6R1 |
| hsa-mir-492 | GAPVD1 |
| hsa-mir-492 | GMEB2 |
| hsa-mir-492 | TAX1BP3 |
| hsa-mir-492 | SPA17 |
| hsa-mir-492 | RFWD3 |
| hsa-mir-492 | RCC2 |
| hsa-mir-492 | WDR45B |
| hsa-mir-492 | DHX33 |
| hsa-mir-492 | CYP20A1 |
| hsa-mir-492 | INF2 |
| hsa-mir-492 | PYCR3 |
| hsa-mir-492 | AKIRIN1 |
| hsa-mir-492 | COLGALT1 |
| hsa-mir-492 | TMEM246 |
| hsa-mir-492 | SAPCD2 |
| hsa-mir-492 | SLC38A5 |
| hsa-mir-492 | TM4SF18 |
| hsa-mir-492 | PDZD8 |
| hsa-mir-492 | UBN2 |
| hsa-mir-492 | SAMD12 |
| hsa-mir-492 | TMEM239 |
| hsa-mir-497-5p | ABL2 |
| hsa-mir-497-5p | ACVR2A |
| hsa-mir-497-5p | ADORA3 |
| hsa-mir-497-5p | ADRA2B |
| hsa-mir-497-5p | AP2B1 |
| hsa-mir-497-5p | ALDH3B1 |
| hsa-mir-497-5p | ALDH9A1 |
| hsa-mir-497-5p | BIRC5 |
| hsa-mir-497-5p | APP |
| hsa-mir-497-5p | ABCC6 |
| hsa-mir-497-5p | ARHGDIA |
| hsa-mir-497-5p | ASGR2 |
| hsa-mir-497-5p | ATP5G3 |
| hsa-mir-497-5p | CCND1 |
| hsa-mir-497-5p | BCL2 |
| hsa-mir-497-5p | CA8 |
| hsa-mir-497-5p | CALU |
| hsa-mir-497-5p | CANX |
| hsa-mir-497-5p | CAPZA2 |
| hsa-mir-497-5p | RUNX2 |
| hsa-mir-497-5p | RUNX1T1 |
| hsa-mir-497-5p | CCND2 |
| hsa-mir-497-5p | CCND3 |
| hsa-mir-497-5p | CCNE1 |
| hsa-mir-497-5p | CCNT1 |
| hsa-mir-497-5p | ENTPD1 |
| hsa-mir-497-5p | CDK1 |
| hsa-mir-497-5p | CDC25A |
| hsa-mir-497-5p | CDK4 |
| hsa-mir-497-5p | CDK6 |
| hsa-mir-497-5p | CHEK1 |
| hsa-mir-497-5p | CLU |
| hsa-mir-497-5p | CREBL2 |
| hsa-mir-497-5p | CRK |
| hsa-mir-497-5p | CRKL |
| hsa-mir-497-5p | CSNK1E |
| hsa-mir-497-5p | DDX3X |
| hsa-mir-497-5p | DECR1 |
| hsa-mir-497-5p | DIAPH1 |
| hsa-mir-497-5p | DMPK |
| hsa-mir-497-5p | E2F3 |
| hsa-mir-497-5p | EEF1A1 |
| hsa-mir-497-5p | EFNB2 |
| hsa-mir-497-5p | EIF1AX |
| hsa-mir-497-5p | EIF4E |
| hsa-mir-497-5p | ELK4 |
| hsa-mir-497-5p | EN2 |
| hsa-mir-497-5p | SLC29A1 |
| hsa-mir-497-5p | ESRRA |
| hsa-mir-497-5p | EXT1 |
| hsa-mir-497-5p | FASN |
| hsa-mir-497-5p | FGF2 |
| hsa-mir-497-5p | FGFR4 |
| hsa-mir-497-5p | FKBP1A |
| hsa-mir-497-5p | FLOT2 |
| hsa-mir-497-5p | MTOR |
| hsa-mir-497-5p | GABPA |
| hsa-mir-497-5p | GALNT1 |
| hsa-mir-497-5p | NR6A1 |
| hsa-mir-497-5p | GNAL |
| hsa-mir-497-5p | GNAT1 |
| hsa-mir-497-5p | GNB1 |
| hsa-mir-497-5p | GPR27 |
| hsa-mir-497-5p | GRB2 |
| hsa-mir-497-5p | HDGF |
| hsa-mir-497-5p | HNRNPA1 |
| hsa-mir-497-5p | HNRNPA2B1 |
| hsa-mir-497-5p | HOXA3 |
| hsa-mir-497-5p | HOXA10 |
| hsa-mir-497-5p | HOXC8 |
| hsa-mir-497-5p | DNAJA1 |
| hsa-mir-497-5p | HSPA1B |
| hsa-mir-497-5p | HSPA8 |
| hsa-mir-497-5p | IGF1R |
| hsa-mir-497-5p | RBPJ |
| hsa-mir-497-5p | IKBKB |
| hsa-mir-497-5p | ITGA2 |
| hsa-mir-497-5p | JARID2 |
| hsa-mir-497-5p | KCNN4 |
| hsa-mir-497-5p | KIF5B |
| hsa-mir-497-5p | KPNA1 |
| hsa-mir-497-5p | KPNA3 |
| hsa-mir-497-5p | KRT33B |
| hsa-mir-497-5p | LAMC1 |
| hsa-mir-497-5p | LAMP2 |
| hsa-mir-497-5p | CD180 |
| hsa-mir-497-5p | TM4SF1 |
| hsa-mir-497-5p | SMAD3 |
| hsa-mir-497-5p | SMAD7 |
| hsa-mir-497-5p | MTHFR |
| hsa-mir-497-5p | MYO5A |
| hsa-mir-497-5p | NFIC |
| hsa-mir-497-5p | NOTCH2 |
| hsa-mir-497-5p | OCRL |
| hsa-mir-497-5p | ORC4 |
| hsa-mir-497-5p | FURIN |
| hsa-mir-497-5p | PAFAH1B2 |
| hsa-mir-497-5p | PAK2 |
| hsa-mir-497-5p | PBX3 |
| hsa-mir-497-5p | CDK17 |
| hsa-mir-497-5p | PDCD1 |
| hsa-mir-497-5p | PDE4D |
| hsa-mir-497-5p | PHKA1 |
| hsa-mir-497-5p | PIM1 |
| hsa-mir-497-5p | PIK3R1 |
| hsa-mir-497-5p | PLAG1 |
| hsa-mir-497-5p | PLRG1 |
| hsa-mir-497-5p | POLR2E |
| hsa-mir-497-5p | PPM1A |
| hsa-mir-497-5p | PPP2R5C |
| hsa-mir-497-5p | PRKAA1 |
| hsa-mir-497-5p | PRKAR2A |
| hsa-mir-497-5p | MAP2K1 |
| hsa-mir-497-5p | MAP2K3 |
| hsa-mir-497-5p | PTPRD |
| hsa-mir-497-5p | MAP4K2 |
| hsa-mir-497-5p | RAD23B |
| hsa-mir-497-5p | RAF1 |
| hsa-mir-497-5p | RARB |
| hsa-mir-497-5p | RBBP6 |
| hsa-mir-497-5p | REL |
| hsa-mir-497-5p | RPS6KB1 |
| hsa-mir-497-5p | RS1 |
| hsa-mir-497-5p | SALL1 |
| hsa-mir-497-5p | SRSF1 |
| hsa-mir-497-5p | SKI |
| hsa-mir-497-5p | SLC2A3 |
| hsa-mir-497-5p | SNCG |
| hsa-mir-497-5p | SNRPB2 |
| hsa-mir-497-5p | SNTB2 |
| hsa-mir-497-5p | SRPRA |
| hsa-mir-497-5p | SSRP1 |
| hsa-mir-497-5p | SYPL1 |
| hsa-mir-497-5p | TAF13 |
| hsa-mir-497-5p | MAP3K7 |
| hsa-mir-497-5p | TARBP2 |
| hsa-mir-497-5p | TCEA1 |
| hsa-mir-497-5p | PPP1R11 |
| hsa-mir-497-5p | TFAP2A |
| hsa-mir-497-5p | TGFBR3 |
| hsa-mir-497-5p | TLL1 |
| hsa-mir-497-5p | TPM1 |
| hsa-mir-497-5p | TPM2 |
| hsa-mir-497-5p | TPM3 |
| hsa-mir-497-5p | TUBB2A |
| hsa-mir-497-5p | TWIST1 |
| hsa-mir-497-5p | UBE2H |
| hsa-mir-497-5p | UBE2V1 |
| hsa-mir-497-5p | UGT2B4 |
| hsa-mir-497-5p | VAV2 |
| hsa-mir-497-5p | VEGFA |
| hsa-mir-497-5p | WEE1 |
| hsa-mir-497-5p | WNT7A |
| hsa-mir-497-5p | YWHAH |
| hsa-mir-497-5p | ZBTB16 |
| hsa-mir-497-5p | LUZP1 |
| hsa-mir-497-5p | MAFK |
| hsa-mir-497-5p | SHOC2 |
| hsa-mir-497-5p | KMT2D |
| hsa-mir-497-5p | AXIN2 |
| hsa-mir-497-5p | FZD6 |
| hsa-mir-497-5p | FZD9 |
| hsa-mir-497-5p | HIST2H2BE |
| hsa-mir-497-5p | HIST1H3H |
| hsa-mir-497-5p | RECK |
| hsa-mir-497-5p | DYRK3 |
| hsa-mir-497-5p | CUL3 |
| hsa-mir-497-5p | OGT |
| hsa-mir-497-5p | CBX4 |
| hsa-mir-497-5p | CASK |
| hsa-mir-497-5p | SLC25A12 |
| hsa-mir-497-5p | PLPP3 |
| hsa-mir-497-5p | TNFSF9 |
| hsa-mir-497-5p | NAPG |
| hsa-mir-497-5p | EIF2B2 |
| hsa-mir-497-5p | MTMR3 |
| hsa-mir-497-5p | MBD4 |
| hsa-mir-497-5p | BTRC |
| hsa-mir-497-5p | RPL14 |
| hsa-mir-497-5p | GPRC5A |
| hsa-mir-497-5p | CCNE2 |
| hsa-mir-497-5p | LRRFIP2 |
| hsa-mir-497-5p | GLP2R |
| hsa-mir-497-5p | EFTUD2 |
| hsa-mir-497-5p | PPIG |
| hsa-mir-497-5p | KIF23 |
| hsa-mir-497-5p | TBPL1 |
| hsa-mir-497-5p | GOSR1 |
| hsa-mir-497-5p | BAG4 |
| hsa-mir-497-5p | IER2 |
| hsa-mir-497-5p | SOCS5 |
| hsa-mir-497-5p | N4BP1 |
| hsa-mir-497-5p | BZW1 |
| hsa-mir-497-5p | RUBCN |
| hsa-mir-497-5p | ARHGAP32 |
| hsa-mir-497-5p | RASSF2 |
| hsa-mir-497-5p | RIMS3 |
| hsa-mir-497-5p | PHYHIP |
| hsa-mir-497-5p | TSC22D2 |
| hsa-mir-497-5p | EPM2AIP1 |
| hsa-mir-497-5p | LRIG2 |
| hsa-mir-497-5p | TLK1 |
| hsa-mir-497-5p | AP5Z1 |
| hsa-mir-497-5p | USP15 |
| hsa-mir-497-5p | THRAP3 |
| hsa-mir-497-5p | HNRNPDL |
| hsa-mir-497-5p | DMTF1 |
| hsa-mir-497-5p | AKT3 |
| hsa-mir-497-5p | ACTR2 |
| hsa-mir-497-5p | PDIA6 |
| hsa-mir-497-5p | CTDSPL |
| hsa-mir-497-5p | ZNF267 |
| hsa-mir-497-5p | LANCL1 |
| hsa-mir-497-5p | BTN3A3 |
| hsa-mir-497-5p | CARM1 |
| hsa-mir-497-5p | IVNS1ABP |
| hsa-mir-497-5p | TXNIP |
| hsa-mir-497-5p | DMRT2 |
| hsa-mir-497-5p | B3GNT2 |
| hsa-mir-497-5p | NUP50 |
| hsa-mir-497-5p | TOB2 |
| hsa-mir-497-5p | NCKAP1 |
| hsa-mir-497-5p | ZNF460 |
| hsa-mir-497-5p | SEC24A |
| hsa-mir-497-5p | ZNF275 |
| hsa-mir-497-5p | PNPLA6 |
| hsa-mir-497-5p | RNPS1 |
| hsa-mir-497-5p | PRSS21 |
| hsa-mir-497-5p | YWHAQ |
| hsa-mir-497-5p | ABHD2 |
| hsa-mir-497-5p | PRDM4 |
| hsa-mir-497-5p | RCAN3 |
| hsa-mir-497-5p | BAZ2A |
| hsa-mir-497-5p | PLPBP |
| hsa-mir-497-5p | SYNRG |
| hsa-mir-497-5p | STK38 |
| hsa-mir-497-5p | HSPA4L |
| hsa-mir-497-5p | CPEB3 |
| hsa-mir-497-5p | ATG14 |
| hsa-mir-497-5p | TRAK1 |
| hsa-mir-497-5p | PHLPP2 |
| hsa-mir-497-5p | SETD1B |
| hsa-mir-497-5p | AVL9 |
| hsa-mir-497-5p | TRIM35 |
| hsa-mir-497-5p | TTLL5 |
| hsa-mir-497-5p | TNRC6B |
| hsa-mir-497-5p | GPATCH8 |
| hsa-mir-497-5p | KANK1 |
| hsa-mir-497-5p | RPRD2 |
| hsa-mir-497-5p | PPIP5K2 |
| hsa-mir-497-5p | CLUH |
| hsa-mir-497-5p | KIAA0895 |
| hsa-mir-497-5p | DICER1 |
| hsa-mir-497-5p | CBX6 |
| hsa-mir-497-5p | NNT |
| hsa-mir-497-5p | CD2AP |
| hsa-mir-497-5p | SH3BP4 |
| hsa-mir-497-5p | GABARAPL1 |
| hsa-mir-497-5p | TMEM245 |
| hsa-mir-497-5p | PISD |
| hsa-mir-497-5p | BRD1 |
| hsa-mir-497-5p | ARIH1 |
| hsa-mir-497-5p | MOB4 |
| hsa-mir-497-5p | ANAPC13 |
| hsa-mir-497-5p | PNISR |
| hsa-mir-497-5p | HIGD1A |
| hsa-mir-497-5p | OSBPL3 |
| hsa-mir-497-5p | SZRD1 |
| hsa-mir-497-5p | WIPI2 |
| hsa-mir-497-5p | SERBP1 |
| hsa-mir-497-5p | PHF19 |
| hsa-mir-497-5p | HEYL |
| hsa-mir-497-5p | AGO2 |
| hsa-mir-497-5p | VPS4A |
| hsa-mir-497-5p | SLCO3A1 |
| hsa-mir-497-5p | C16orf72 |
| hsa-mir-497-5p | SSU72 |
| hsa-mir-497-5p | CLEC2D |
| hsa-mir-497-5p | CD274 |
| hsa-mir-497-5p | RACGAP1 |
| hsa-mir-497-5p | CARD10 |
| hsa-mir-497-5p | HCFC2 |
| hsa-mir-497-5p | SEC61A1 |
| hsa-mir-497-5p | PSAT1 |
| hsa-mir-497-5p | MINK1 |
| hsa-mir-497-5p | ASCC1 |
| hsa-mir-497-5p | DESI2 |
| hsa-mir-497-5p | ZNF691 |
| hsa-mir-497-5p | FCF1 |
| hsa-mir-497-5p | SIDT2 |
| hsa-mir-497-5p | CRIM1 |
| hsa-mir-497-5p | ANKMY1 |
| hsa-mir-497-5p | PPIL1 |
| hsa-mir-497-5p | RAB23 |
| hsa-mir-497-5p | LUC7L3 |
| hsa-mir-497-5p | TM7SF3 |
| hsa-mir-497-5p | CHIC1 |
| hsa-mir-497-5p | Reck |
| hsa-mir-497-5p | C11orf24 |
| hsa-mir-497-5p | DNAJC10 |
| hsa-mir-497-5p | ANLN |
| hsa-mir-497-5p | USP53 |
| hsa-mir-497-5p | GATAD2A |
| hsa-mir-497-5p | BSPRY |
| hsa-mir-497-5p | AURKAIP1 |
| hsa-mir-497-5p | CDCA4 |
| hsa-mir-497-5p | PLEKHB2 |
| hsa-mir-497-5p | CEP55 |
| hsa-mir-497-5p | RIF1 |
| hsa-mir-497-5p | SBNO1 |
| hsa-mir-497-5p | TMEM100 |
| hsa-mir-497-5p | PPP6R3 |
| hsa-mir-497-5p | PI4K2B |
| hsa-mir-497-5p | RFK |
| hsa-mir-497-5p | SLC39A9 |
| hsa-mir-497-5p | STRADB |
| hsa-mir-497-5p | UBE2Q1 |
| hsa-mir-497-5p | PNRC2 |
| hsa-mir-497-5p | CDC37L1 |
| hsa-mir-497-5p | PAG1 |
| hsa-mir-497-5p | ASH1L |
| hsa-mir-497-5p | GNG12 |
| hsa-mir-497-5p | MTFR1L |
| hsa-mir-497-5p | C21orf62 |
| hsa-mir-497-5p | CYP26B1 |
| hsa-mir-497-5p | CDC42SE2 |
| hsa-mir-497-5p | AKR1B10 |
| hsa-mir-497-5p | RTN4 |
| hsa-mir-497-5p | RALGAPB |
| hsa-mir-497-5p | SMURF1 |
| hsa-mir-497-5p | ACTR3B |
| hsa-mir-497-5p | ODF2L |
| hsa-mir-497-5p | CASKIN1 |
| hsa-mir-497-5p | NUFIP2 |
| hsa-mir-497-5p | TAOK1 |
| hsa-mir-497-5p | KIAA1456 |
| hsa-mir-497-5p | SRPRB |
| hsa-mir-497-5p | RPRD1B |
| hsa-mir-497-5p | DLGAP3 |
| hsa-mir-497-5p | PLEKHA1 |
| hsa-mir-497-5p | CLSPN |
| hsa-mir-497-5p | SNX16 |
| hsa-mir-497-5p | VSIR |
| hsa-mir-497-5p | ZMAT3 |
| hsa-mir-497-5p | NUCKS1 |
| hsa-mir-497-5p | WDR13 |
| hsa-mir-497-5p | C16orf58 |
| hsa-mir-497-5p | IPPK |
| hsa-mir-497-5p | RAPH1 |
| hsa-mir-497-5p | SOWAHC |
| hsa-mir-497-5p | WNK3 |
| hsa-mir-497-5p | GRAMD2B |
| hsa-mir-497-5p | ZBTB10 |
| hsa-mir-497-5p | ATG9A |
| hsa-mir-497-5p | CHAC1 |
| hsa-mir-497-5p | HAUS3 |
| hsa-mir-497-5p | PAGR1 |
| hsa-mir-497-5p | YRDC |
| hsa-mir-497-5p | CLIP4 |
| hsa-mir-497-5p | ZFHX4 |
| hsa-mir-497-5p | CPSF7 |
| hsa-mir-497-5p | ATAD5 |
| hsa-mir-497-5p | L2HGDH |
| hsa-mir-497-5p | PHC3 |
| hsa-mir-497-5p | NAA25 |
| hsa-mir-497-5p | PANK2 |
| hsa-mir-497-5p | FBXL18 |
| hsa-mir-497-5p | DCAF17 |
| hsa-mir-497-5p | C3orf36 |
| hsa-mir-497-5p | KLHL15 |
| hsa-mir-497-5p | VOPP1 |
| hsa-mir-497-5p | C1orf21 |
| hsa-mir-497-5p | CDADC1 |
| hsa-mir-497-5p | GSG1 |
| hsa-mir-497-5p | BCL2L12 |
| hsa-mir-497-5p | FAM103A1 |
| hsa-mir-497-5p | USP42 |
| hsa-mir-497-5p | ZNRF3 |
| hsa-mir-497-5p | USP48 |
| hsa-mir-497-5p | POLDIP3 |
| hsa-mir-497-5p | ZDHHC16 |
| hsa-mir-497-5p | MSANTD4 |
| hsa-mir-497-5p | DCTN5 |
| hsa-mir-497-5p | CBX2 |
| hsa-mir-497-5p | TBRG1 |
| hsa-mir-497-5p | ZNRF1 |
| hsa-mir-497-5p | FBXL20 |
| hsa-mir-497-5p | ZCCHC3 |
| hsa-mir-497-5p | MCFD2 |
| hsa-mir-497-5p | ZNF622 |
| hsa-mir-497-5p | JPT2 |
| hsa-mir-497-5p | SESTD1 |
| hsa-mir-497-5p | SMDT1 |
| hsa-mir-497-5p | YTHDC1 |
| hsa-mir-497-5p | ZNF585B |
| hsa-mir-497-5p | ARHGAP12 |
| hsa-mir-497-5p | AHNAK2 |
| hsa-mir-497-5p | SCAMP4 |
| hsa-mir-497-5p | RAB3IP |
| hsa-mir-497-5p | OSCAR |
| hsa-mir-497-5p | CHMP4B |
| hsa-mir-497-5p | UBR3 |
| hsa-mir-497-5p | KLHL40 |
| hsa-mir-497-5p | LSM11 |
| hsa-mir-497-5p | DOCK11 |
| hsa-mir-497-5p | ZFP28 |
| hsa-mir-497-5p | DYNLL2 |
| hsa-mir-497-5p | SREK1 |
| hsa-mir-497-5p | CACUL1 |
| hsa-mir-497-5p | E2F7 |
| hsa-mir-497-5p | HNRNPA1L2 |
| hsa-mir-497-5p | CMTM4 |
| hsa-mir-497-5p | SIK1 |
| hsa-mir-497-5p | CCDC80 |
| hsa-mir-497-5p | CREBRF |
| hsa-mir-497-5p | TMEM161B |
| hsa-mir-497-5p | CNKSR3 |
| hsa-mir-497-5p | AMOT |
| hsa-mir-497-5p | AMOTL1 |
| hsa-mir-497-5p | CAMSAP1 |
| hsa-mir-497-5p | RASEF |
| hsa-mir-497-5p | FAM122B |
| hsa-mir-497-5p | GPR180 |
| hsa-mir-497-5p | SPRED1 |
| hsa-mir-497-5p | RNF168 |
| hsa-mir-497-5p | PRICKLE2 |
| hsa-mir-497-5p | AGO4 |
| hsa-mir-497-5p | ZNF367 |
| hsa-mir-497-5p | FLCN |
| hsa-mir-497-5p | DENND6A |
| hsa-mir-497-5p | ZNF449 |
| hsa-mir-497-5p | CCDC83 |
| hsa-mir-497-5p | ARMC12 |
| hsa-mir-497-5p | FOXK1 |
| hsa-mir-497-5p | ZNRF2 |
| hsa-mir-497-5p | ZNF620 |
| hsa-mir-497-5p | UBN2 |
| hsa-mir-497-5p | NEGR1 |
| hsa-mir-497-5p | MKX |
| hsa-mir-497-5p | RNF149 |
| hsa-mir-497-5p | LURAP1L |
| hsa-mir-497-5p | YIPF6 |
| hsa-mir-497-5p | HIST2H3A |
| hsa-mir-497-5p | MSL1 |
| hsa-mir-497-5p | ZNF284 |
| hsa-mir-497-5p | XKR7 |
| hsa-mir-497-5p | ZNF391 |
| hsa-mir-497-5p | MACC1 |
| hsa-mir-497-5p | ANKRD36 |
| hsa-mir-497-5p | RAB15 |
| hsa-mir-497-5p | TMEM189 |
| hsa-mir-497-5p | TMEM189-UBE2V1 |
| hsa-mir-497-5p | C1orf226 |
| hsa-mir-497-5p | ZBTB34 |
| hsa-mir-497-5p | CCDC88C |
| hsa-mir-497-5p | ATXN7L3B |
| hsa-mir-497-5p | FAM229B |
| hsa-mir-497-5p | ZNF704 |
| hsa-mir-497-5p | SLC35E2B |
| hsa-mir-497-5p | POM121C |
| hsa-mir-497-5p | HSPE1-MOB4 |
| hsa-mir-130b-5p | AAMP |
| hsa-mir-130b-5p | ADPRH |
| hsa-mir-130b-5p | AHCY |
| hsa-mir-130b-5p | ALDH1B1 |
| hsa-mir-130b-5p | ASCL1 |
| hsa-mir-130b-5p | SERPINC1 |
| hsa-mir-130b-5p | ATIC |
| hsa-mir-130b-5p | BDKRB2 |
| hsa-mir-130b-5p | POLR3D |
| hsa-mir-130b-5p | CD86 |
| hsa-mir-130b-5p | ENTPD5 |
| hsa-mir-130b-5p | CD44 |
| hsa-mir-130b-5p | CDC5L |
| hsa-mir-130b-5p | CHD1 |
| hsa-mir-130b-5p | COL4A4 |
| hsa-mir-130b-5p | COPB1 |
| hsa-mir-130b-5p | COX6B1 |
| hsa-mir-130b-5p | CRY2 |
| hsa-mir-130b-5p | CSE1L |
| hsa-mir-130b-5p | CST3 |
| hsa-mir-130b-5p | CD55 |
| hsa-mir-130b-5p | DDX3X |
| hsa-mir-130b-5p | DHCR24 |
| hsa-mir-130b-5p | DIAPH1 |
| hsa-mir-130b-5p | DIO2 |
| hsa-mir-130b-5p | ARID3A |
| hsa-mir-130b-5p | RCAN1 |
| hsa-mir-130b-5p | EIF2S1 |
| hsa-mir-130b-5p | ELAVL3 |
| hsa-mir-130b-5p | EMP2 |
| hsa-mir-130b-5p | EMX2 |
| hsa-mir-130b-5p | EP300 |
| hsa-mir-130b-5p | EPHX2 |
| hsa-mir-130b-5p | FASN |
| hsa-mir-130b-5p | FGF1 |
| hsa-mir-130b-5p | GPC5 |
| hsa-mir-130b-5p | FOXO1 |
| hsa-mir-130b-5p | FZD2 |
| hsa-mir-130b-5p | GALR1 |
| hsa-mir-130b-5p | GRIN2A |
| hsa-mir-130b-5p | HIP1 |
| hsa-mir-130b-5p | HLA-DOA |
| hsa-mir-130b-5p | HRH1 |
| hsa-mir-130b-5p | HSPA1B |
| hsa-mir-130b-5p | HSPA6 |
| hsa-mir-130b-5p | HSPA8 |
| hsa-mir-130b-5p | IGF1 |
| hsa-mir-130b-5p | ITGA1 |
| hsa-mir-130b-5p | JAG2 |
| hsa-mir-130b-5p | CD82 |
| hsa-mir-130b-5p | KCNJ6 |
| hsa-mir-130b-5p | KRT32 |
| hsa-mir-130b-5p | LPP |
| hsa-mir-130b-5p | LRP6 |
| hsa-mir-130b-5p | MC2R |
| hsa-mir-130b-5p | MAP3K5 |
| hsa-mir-130b-5p | MID1 |
| hsa-mir-130b-5p | ATXN3 |
| hsa-mir-130b-5p | KMT2A |
| hsa-mir-130b-5p | CD200 |
| hsa-mir-130b-5p | MRE11 |
| hsa-mir-130b-5p | MT1A |
| hsa-mir-130b-5p | ND6 |
| hsa-mir-130b-5p | MUT |
| hsa-mir-130b-5p | MYBPC1 |
| hsa-mir-130b-5p | NOTCH2 |
| hsa-mir-130b-5p | SIX6 |
| hsa-mir-130b-5p | P2RX7 |
| hsa-mir-130b-5p | PDE3A |
| hsa-mir-130b-5p | PDGFA |
| hsa-mir-130b-5p | PDHA1 |
| hsa-mir-130b-5p | PIK3C2B |
| hsa-mir-130b-5p | PIK3CB |
| hsa-mir-130b-5p | PLCL1 |
| hsa-mir-130b-5p | PLP1 |
| hsa-mir-130b-5p | PLSCR1 |
| hsa-mir-130b-5p | POU2F2 |
| hsa-mir-130b-5p | PPARA |
| hsa-mir-130b-5p | PPP2CB |
| hsa-mir-130b-5p | PRIM1 |
| hsa-mir-130b-5p | PRKCB |
| hsa-mir-130b-5p | PRLR |
| hsa-mir-130b-5p | PSMB5 |
| hsa-mir-130b-5p | PTMA |
| hsa-mir-130b-5p | PTPN11 |
| hsa-mir-130b-5p | PTPRM |
| hsa-mir-130b-5p | RAB1A |
| hsa-mir-130b-5p | RANGAP1 |
| hsa-mir-130b-5p | KDM5A |
| hsa-mir-130b-5p | RPL8 |
| hsa-mir-130b-5p | RPL36AL |
| hsa-mir-130b-5p | ATXN7 |
| hsa-mir-130b-5p | CCL16 |
| hsa-mir-130b-5p | SHOX |
| hsa-mir-130b-5p | SLC4A1 |
| hsa-mir-130b-5p | SLC22A3 |
| hsa-mir-130b-5p | STAT5A |
| hsa-mir-130b-5p | STXBP2 |
| hsa-mir-130b-5p | TACR3 |
| hsa-mir-130b-5p | TAL2 |
| hsa-mir-130b-5p | TBXA2R |
| hsa-mir-130b-5p | ELOB |
| hsa-mir-130b-5p | TFDP2 |
| hsa-mir-130b-5p | TFRC |
| hsa-mir-130b-5p | TGFBR3 |
| hsa-mir-130b-5p | THBS2 |
| hsa-mir-130b-5p | TRAPPC10 |
| hsa-mir-130b-5p | TNS1 |
| hsa-mir-130b-5p | TTC3 |
| hsa-mir-130b-5p | UCHL3 |
| hsa-mir-130b-5p | UQCRB |
| hsa-mir-130b-5p | VCL |
| hsa-mir-130b-5p | VEGFB |
| hsa-mir-130b-5p | WEE1 |
| hsa-mir-130b-5p | YWHAB |
| hsa-mir-130b-5p | ZFX |
| hsa-mir-130b-5p | ZNF85 |
| hsa-mir-130b-5p | SLC30A3 |
| hsa-mir-130b-5p | DEK |
| hsa-mir-130b-5p | STAM |
| hsa-mir-130b-5p | CUBN |
| hsa-mir-130b-5p | TTF2 |
| hsa-mir-130b-5p | CDC42BPA |
| hsa-mir-130b-5p | PCDHGB4 |
| hsa-mir-130b-5p | VAMP8 |
| hsa-mir-130b-5p | B3GALNT1 |
| hsa-mir-130b-5p | CD84 |
| hsa-mir-130b-5p | PROM1 |
| hsa-mir-130b-5p | SPAG9 |
| hsa-mir-130b-5p | SYNGR1 |
| hsa-mir-130b-5p | LRRFIP1 |
| hsa-mir-130b-5p | DHRS3 |
| hsa-mir-130b-5p | TXNL1 |
| hsa-mir-130b-5p | KCNK6 |
| hsa-mir-130b-5p | EEF1E1 |
| hsa-mir-130b-5p | BAG2 |
| hsa-mir-130b-5p | GOSR2 |
| hsa-mir-130b-5p | NCOR2 |
| hsa-mir-130b-5p | RGS6 |
| hsa-mir-130b-5p | SH3PXD2A |
| hsa-mir-130b-5p | DZIP3 |
| hsa-mir-130b-5p | FAM53B |
| hsa-mir-130b-5p | RIMS3 |
| hsa-mir-130b-5p | MAML1 |
| hsa-mir-130b-5p | ZC3H11A |
| hsa-mir-130b-5p | RNF10 |
| hsa-mir-130b-5p | HELZ |
| hsa-mir-130b-5p | OXSR1 |
| hsa-mir-130b-5p | ATP9A |
| hsa-mir-130b-5p | RAD50 |
| hsa-mir-130b-5p | ABI2 |
| hsa-mir-130b-5p | STX6 |
| hsa-mir-130b-5p | HNRNPR |
| hsa-mir-130b-5p | CALCOCO2 |
| hsa-mir-130b-5p | SPRY3 |
| hsa-mir-130b-5p | SF3A1 |
| hsa-mir-130b-5p | TIMM17A |
| hsa-mir-130b-5p | VAV3 |
| hsa-mir-130b-5p | AGPAT1 |
| hsa-mir-130b-5p | EXOC5 |
| hsa-mir-130b-5p | POLD3 |
| hsa-mir-130b-5p | HBS1L |
| hsa-mir-130b-5p | WASF3 |
| hsa-mir-130b-5p | SRCAP |
| hsa-mir-130b-5p | PRSS21 |
| hsa-mir-130b-5p | FGFR1OP |
| hsa-mir-130b-5p | BTN3A2 |
| hsa-mir-130b-5p | AKAP2 |
| hsa-mir-130b-5p | DUSP10 |
| hsa-mir-130b-5p | SYNPO |
| hsa-mir-130b-5p | IKZF2 |
| hsa-mir-130b-5p | PLEKHA6 |
| hsa-mir-130b-5p | KIN |
| hsa-mir-130b-5p | IGSF9B |
| hsa-mir-130b-5p | EMC1 |
| hsa-mir-130b-5p | ANKRD28 |
| hsa-mir-130b-5p | PDS5A |
| hsa-mir-130b-5p | EXOC7 |
| hsa-mir-130b-5p | PSD3 |
| hsa-mir-130b-5p | SMG5 |
| hsa-mir-130b-5p | QPRT |
| hsa-mir-130b-5p | UBBP4 |
| hsa-mir-130b-5p | HYPK |
| hsa-mir-130b-5p | C22orf24 |
| hsa-mir-130b-5p | SAMHD1 |
| hsa-mir-130b-5p | RSL1D1 |
| hsa-mir-130b-5p | TMEM251 |
| hsa-mir-130b-5p | FBXO9 |
| hsa-mir-130b-5p | RGS17 |
| hsa-mir-130b-5p | SULT1C4 |
| hsa-mir-130b-5p | HCFC2 |
| hsa-mir-130b-5p | CDON |
| hsa-mir-130b-5p | SLC35B3 |
| hsa-mir-130b-5p | MLXIPL |
| hsa-mir-130b-5p | COA4 |
| hsa-mir-130b-5p | NRN1 |
| hsa-mir-130b-5p | RWDD1 |
| hsa-mir-130b-5p | RAPGEF6 |
| hsa-mir-130b-5p | CDK12 |
| hsa-mir-130b-5p | RBM27 |
| hsa-mir-130b-5p | UGT2B28 |
| hsa-mir-130b-5p | TMCO1 |
| hsa-mir-130b-5p | CCDC93 |
| hsa-mir-130b-5p | OTUD4 |
| hsa-mir-130b-5p | PPP1R12C |
| hsa-mir-130b-5p | KLHL28 |
| hsa-mir-130b-5p | GIN1 |
| hsa-mir-130b-5p | MFSD6 |
| hsa-mir-130b-5p | PIGG |
| hsa-mir-130b-5p | ADPRHL2 |
| hsa-mir-130b-5p | SDHAF2 |
| hsa-mir-130b-5p | ZSCAN2 |
| hsa-mir-130b-5p | RALGPS2 |
| hsa-mir-130b-5p | TMLHE |
| hsa-mir-130b-5p | QRSL1 |
| hsa-mir-130b-5p | ACER3 |
| hsa-mir-130b-5p | DHTKD1 |
| hsa-mir-130b-5p | PLXNA3 |
| hsa-mir-130b-5p | CDC37L1 |
| hsa-mir-130b-5p | ASF1B |
| hsa-mir-130b-5p | N4BP2 |
| hsa-mir-130b-5p | OGDHL |
| hsa-mir-130b-5p | NSFL1C |
| hsa-mir-130b-5p | AKIP1 |
| hsa-mir-130b-5p | DPYSL5 |
| hsa-mir-130b-5p | C1GALT1 |
| hsa-mir-130b-5p | MEIS3 |
| hsa-mir-130b-5p | LHX9 |
| hsa-mir-130b-5p | BBX |
| hsa-mir-130b-5p | EPPIN |
| hsa-mir-130b-5p | SCYL3 |
| hsa-mir-130b-5p | ZNF286A |
| hsa-mir-130b-5p | GJD2 |
| hsa-mir-130b-5p | AS3MT |
| hsa-mir-130b-5p | MYORG |
| hsa-mir-130b-5p | NLGN4X |
| hsa-mir-130b-5p | ARRDC3 |
| hsa-mir-130b-5p | EBF4 |
| hsa-mir-130b-5p | USP37 |
| hsa-mir-130b-5p | ENPP5 |
| hsa-mir-130b-5p | HIVEP3 |
| hsa-mir-130b-5p | SCOC |
| hsa-mir-130b-5p | RBM26 |
| hsa-mir-130b-5p | LHX5 |
| hsa-mir-130b-5p | ABCG5 |
| hsa-mir-130b-5p | XPO4 |
| hsa-mir-130b-5p | HHIP |
| hsa-mir-130b-5p | TBC1D15 |
| hsa-mir-130b-5p | WNK1 |
| hsa-mir-130b-5p | GDAP1L1 |
| hsa-mir-130b-5p | NUP37 |
| hsa-mir-130b-5p | SECISBP2 |
| hsa-mir-130b-5p | PRRG4 |
| hsa-mir-130b-5p | TMEM109 |
| hsa-mir-130b-5p | ZNF557 |
| hsa-mir-130b-5p | PAGR1 |
| hsa-mir-130b-5p | CERS4 |
| hsa-mir-130b-5p | WDR59 |
| hsa-mir-130b-5p | ALG9 |
| hsa-mir-130b-5p | SVEP1 |
| hsa-mir-130b-5p | CSRNP3 |
| hsa-mir-130b-5p | WDR26 |
| hsa-mir-130b-5p | PNPLA3 |
| hsa-mir-130b-5p | CFHR5 |
| hsa-mir-130b-5p | TRIM8 |
| hsa-mir-130b-5p | FAM83D |
| hsa-mir-130b-5p | PITPNM3 |
| hsa-mir-130b-5p | ATG10 |
| hsa-mir-130b-5p | MAGT1 |
| hsa-mir-130b-5p | C9orf64 |
| hsa-mir-130b-5p | SYVN1 |
| hsa-mir-130b-5p | DCTN5 |
| hsa-mir-130b-5p | USP32 |
| hsa-mir-130b-5p | TRIM63 |
| hsa-mir-130b-5p | NFKBID |
| hsa-mir-130b-5p | FIZ1 |
| hsa-mir-130b-5p | CGNL1 |
| hsa-mir-130b-5p | ZIC5 |
| hsa-mir-130b-5p | SSH2 |
| hsa-mir-130b-5p | RRP36 |
| hsa-mir-130b-5p | NAV2 |
| hsa-mir-130b-5p | FAAP24 |
| hsa-mir-130b-5p | RFT1 |
| hsa-mir-130b-5p | ATP6AP1L |
| hsa-mir-130b-5p | ATXN3L |
| hsa-mir-130b-5p | MYOCD |
| hsa-mir-130b-5p | SMIM12 |
| hsa-mir-130b-5p | GALNT13 |
| hsa-mir-130b-5p | SLC26A7 |
| hsa-mir-130b-5p | CYYR1 |
| hsa-mir-130b-5p | FRMD6 |
| hsa-mir-130b-5p | C15orf40 |
| hsa-mir-130b-5p | SYT2 |
| hsa-mir-130b-5p | TRABD2A |
| hsa-mir-130b-5p | EGFLAM |
| hsa-mir-130b-5p | JMY |
| hsa-mir-130b-5p | MTPN |
| hsa-mir-130b-5p | MUC17 |
| hsa-mir-130b-5p | RIMS4 |
| hsa-mir-130b-5p | SREK1 |
| hsa-mir-130b-5p | C15orf61 |
| hsa-mir-130b-5p | FBXL16 |
| hsa-mir-130b-5p | CBLN2 |
| hsa-mir-130b-5p | C1orf210 |
| hsa-mir-130b-5p | GPR155 |
| hsa-mir-130b-5p | TMEM167A |
| hsa-mir-130b-5p | SLC5A12 |
| hsa-mir-130b-5p | ZNF579 |
| hsa-mir-130b-5p | OLIG3 |
| hsa-mir-130b-5p | SPIN3 |
| hsa-mir-130b-5p | FUT11 |
| hsa-mir-130b-5p | ADAMTS18 |
| hsa-mir-130b-5p | FAM9C |
| hsa-mir-130b-5p | METTL15 |
| hsa-mir-130b-5p | CCDC171 |
| hsa-mir-130b-5p | PATL1 |
| hsa-mir-130b-5p | FAM181B |
| hsa-mir-130b-5p | BRAT1 |
| hsa-mir-130b-5p | VGLL2 |
| hsa-mir-130b-5p | PRR14L |
| hsa-mir-130b-5p | ZBTB38 |
| hsa-mir-130b-5p | CALHM5 |
| hsa-mir-130b-5p | TMEM196 |
| hsa-mir-130b-5p | GK5 |
| hsa-mir-130b-5p | PGM2L1 |
| hsa-mir-130b-5p | KANSL1 |
| hsa-mir-130b-5p | C17orf105 |
| hsa-mir-130b-5p | ZNF283 |
| hsa-mir-130b-5p | NLRP9 |
| hsa-mir-130b-5p | S100A7A |
| hsa-mir-130b-5p | MACC1 |
| hsa-mir-130b-5p | ONECUT3 |
| hsa-mir-130b-5p | ZNF793 |
| hsa-mir-130b-5p | FSIP2 |
| hsa-mir-130b-5p | DTHD1 |
| hsa-mir-130b-5p | YY2 |
| hsa-mir-130b-5p | PALM2-AKAP2 |
| hsa-mir-130b-5p | ZNF704 |
| hsa-mir-130b-5p | DNAH10OS |
| hsa-mir-130b-5p | LINC00598 |
| hsa-mir-130b-5p | ZG16 |
| hsa-mir-130b-5p | ZBTB8B |
| hsa-mir-130b-5p | FAM72A |
| hsa-mir-130b-5p | EPPIN-WFDC6 |
| hsa-mir-556-3p | ALAD |
| hsa-mir-556-3p | BRS3 |
| hsa-mir-556-3p | CDK1 |
| hsa-mir-556-3p | ARID3A |
| hsa-mir-556-3p | DSG2 |
| hsa-mir-556-3p | KCNJ8 |
| hsa-mir-556-3p | LBR |
| hsa-mir-556-3p | MYCN |
| hsa-mir-556-3p | TWF1 |
| hsa-mir-556-3p | RPS23 |
| hsa-mir-556-3p | S100A11 |
| hsa-mir-556-3p | SNAPC1 |
| hsa-mir-556-3p | NR2C2 |
| hsa-mir-556-3p | UTRN |
| hsa-mir-556-3p | PRRC2A |
| hsa-mir-556-3p | AOC3 |
| hsa-mir-556-3p | TM4SF5 |
| hsa-mir-556-3p | CCNE2 |
| hsa-mir-556-3p | SRSF11 |
| hsa-mir-556-3p | BZW1 |
| hsa-mir-556-3p | USP6NL |
| hsa-mir-556-3p | NUAK1 |
| hsa-mir-556-3p | G3BP2 |
| hsa-mir-556-3p | ARPC1B |
| hsa-mir-556-3p | TRIM13 |
| hsa-mir-556-3p | DCAF7 |
| hsa-mir-556-3p | COPS8 |
| hsa-mir-556-3p | SAMD4A |
| hsa-mir-556-3p | SALL3 |
| hsa-mir-556-3p | GOLIM4 |
| hsa-mir-556-3p | TMX2 |
| hsa-mir-556-3p | MRPL35 |
| hsa-mir-556-3p | KLF13 |
| hsa-mir-556-3p | PHAX |
| hsa-mir-556-3p | ZNF562 |
| hsa-mir-556-3p | SETD5 |
| hsa-mir-556-3p | ETNK1 |
| hsa-mir-556-3p | PNRC2 |
| hsa-mir-556-3p | KRBOX4 |
| hsa-mir-556-3p | PAG1 |
| hsa-mir-556-3p | CLDND1 |
| hsa-mir-556-3p | KLHL14 |
| hsa-mir-556-3p | KIAA1456 |
| hsa-mir-556-3p | ZIC5 |
| hsa-mir-556-3p | MIDN |
| hsa-mir-556-3p | DCAF15 |
| hsa-mir-556-3p | CDKN2AIPNL |
| hsa-mir-556-3p | SPTY2D1 |
| hsa-mir-556-3p | RNF187 |
| hsa-mir-556-3p | ARSK |
| hsa-mir-556-3p | UBXN2A |
| hsa-mir-556-3p | BRWD3 |
| hsa-mir-556-3p | C5orf51 |
| hsa-mir-556-3p | ANKRD62 |
| hsa-mir-1246 | ADCY9 |
| hsa-mir-1246 | ANXA4 |
| hsa-mir-1246 | CALM2 |
| hsa-mir-1246 | CKS2 |
| hsa-mir-1246 | DYRK1A |
| hsa-mir-1246 | GSK3B |
| hsa-mir-1246 | HTR7 |
| hsa-mir-1246 | MPP2 |
| hsa-mir-1246 | MSH3 |
| hsa-mir-1246 | NFIB |
| hsa-mir-1246 | PIM1 |
| hsa-mir-1246 | PLAGL2 |
| hsa-mir-1246 | PRKAR1A |
| hsa-mir-1246 | PTPRD |
| hsa-mir-1246 | RORA |
| hsa-mir-1246 | SHOX2 |
| hsa-mir-1246 | SKIL |
| hsa-mir-1246 | TAPBP |
| hsa-mir-1246 | ZNF85 |
| hsa-mir-1246 | DGS2 |
| hsa-mir-1246 | AXIN2 |
| hsa-mir-1246 | AKR7A2 |
| hsa-mir-1246 | CRADD |
| hsa-mir-1246 | CBX3 |
| hsa-mir-1246 | CEP162 |
| hsa-mir-1246 | KIAA0895 |
| hsa-mir-1246 | RRP8 |
| hsa-mir-1246 | PYGO1 |
| hsa-mir-1246 | MED4 |
| hsa-mir-1246 | GDE1 |
| hsa-mir-1246 | SRRT |
| hsa-mir-1246 | TMBIM4 |
| hsa-mir-1246 | CHD7 |
| hsa-mir-1246 | ARHGAP15 |
| hsa-mir-1246 | TAOK1 |
| hsa-mir-1246 | CTC1 |
| hsa-mir-1246 | USP48 |
| hsa-mir-1246 | LMNB2 |
| hsa-mir-1246 | ZNF502 |
| hsa-mir-1246 | BRI3BP |
| hsa-mir-1246 | ZNF480 |
| hsa-mir-1246 | CREBRF |
| hsa-mir-1246 | GPATCH11 |
| hsa-mir-1246 | ZNF763 |
| hsa-mir-1258 | AHR |
| hsa-mir-1258 | XIAP |
| hsa-mir-1258 | CPM |
| hsa-mir-1258 | GPR27 |
| hsa-mir-1258 | IFNAR2 |
| hsa-mir-1258 | IPP |
| hsa-mir-1258 | MYH2 |
| hsa-mir-1258 | RB1 |
| hsa-mir-1258 | RLN1 |
| hsa-mir-1258 | MLF2 |
| hsa-mir-1258 | NRIP1 |
| hsa-mir-1258 | NUP50 |
| hsa-mir-1258 | HPSE |
| hsa-mir-1258 | ENPP4 |
| hsa-mir-1258 | TRIM2 |
| hsa-mir-1258 | ZNF281 |
| hsa-mir-1258 | PACSIN1 |
| hsa-mir-1258 | EFEMP2 |
| hsa-mir-1258 | TMED5 |
| hsa-mir-1258 | SETD5 |
| hsa-mir-1258 | LRIF1 |
| hsa-mir-1258 | STARD7 |
| hsa-mir-1258 | FEM1C |
| hsa-mir-1258 | TXNDC16 |
| hsa-mir-1258 | KIAA1468 |
| hsa-mir-1258 | E2F8 |
| hsa-mir-1258 | POLDIP3 |
| hsa-mir-1258 | GLIS2 |
| hsa-mir-1258 | ABHD14B |
| hsa-mir-1258 | ZNF514 |
| hsa-mir-1258 | TBRG1 |
| hsa-mir-1258 | PHYKPL |
| hsa-mir-1258 | MRGPRF |
| hsa-mir-1258 | ANKRD46 |
| hsa-mir-1258 | ZNF322P1 |
| hsa-mir-1258 | NHLRC3 |
| hsa-mir-1468-5p | RPL27A |
| hsa-mir-1468-5p | SRSF2 |
| hsa-mir-1468-5p | SYK |
| hsa-mir-1468-5p | AKR1A1 |
| hsa-mir-1468-5p | SATB2 |
| hsa-mir-1468-5p | DERL2 |
| hsa-mir-1468-5p | BRIX1 |
| hsa-mir-1468-5p | PLXDC1 |
| hsa-mir-1468-5p | LYRM7 |
| hsa-mir-1468-5p | PSORS1C2 |
| hsa-mir-1468-5p | SEMA3D |
| hsa-mir-1468-5p | MMAB |
| hsa-mir-1468-5p | C12orf73 |
| hsa-mir-1468-5p | MTRNR2L3 |
| hsa-mir-1468-5p | MTRNR2L6 |
| hsa-mir-1468-5p | MTRNR2L8 |
| hsa-mir-1468-5p | MTRNR2L9 |

**Abbreviations:** DEM, differentially expressed microRNA.
